# Supplementary material
Source: PubMed Central journal article supplement (PMC5831266)
Supplement: ry170811suppa1.pdf [file ry170811suppa1.pdf]

**Table E1: Clinical Indications for Diagnostic Breast MR Imaging**

| Indication                                                                     | No. of Patients |
|--------------------------------------------------------------------------------|-----------------|
| Evaluation of extent of disease in women with a recent breast cancer diagnosis | 1009 (49)       |
| Evaluation of response to neoadjuvant chemotherapy                             | 219 (11)        |
| Evaluation of breast problem (symptomatic)                                     | 285 (14)        |
| Additional evaluation of recent mammogram, ultrasound, or other imaging        | 156 (8)         |
| Short-interval follow-up of prior MR imaging                                   | 275 (13)        |
| Evaluation of implants                                                         | 9 (<1)          |
| Axillary adenopathy (malignant), unknown primary                               | 17 (<1)         |
| Diagnostic, not otherwise specified                                            | 75 (4)          |
| Total                                                                          | 2045 (100)      |

Note.—Data in parentheses are percentages.
